# Supplementary material for: Closo-Carboranyl- and Metallacarboranyl [1,2,3]triazolyl-Decorated Lapatinib-Scaffold for Cancer Therapy Combining Tyrosine Kinase Inhibition and Boron Neutron Capture Therapy
Source: PubMed Central journal article supplement (PMC7349914; doi:10.3390/cells9061408), 2020-06-05
Supplement: cells-09-01408-s001.pdf [file cells-09-01408-s001.pdf]

# ***Closo*-carboranyl- and Metallacarboranyl[1,2,3]triazolyl-decorated Lapatinib-scaffold for Cancer Therapy Combining Tyrosine Kinase Inhibition and Boron Neutron Capture Therapy**

Marcos Couto, Catalina Alamón, María Fernanda García, Mariángeles Kovacs, Emiliano Trias, Susana Nieves, Emiliano Pozzi, Paula Curotto, Silvia Thorp, María Alejandra Dagrosa, Francesc Teixidor, Clara Viñas and Hugo Cerecetto

## **Supplementary Material**

|                                    |                        |
|------------------------------------|------------------------|
| <b>Spectra developed compounds</b> | <b>.....pages 2–15</b> |
| <b>Figure S1</b>                   | <b>.....page 16</b>    |
| <b>Figure S2</b>                   | <b>.....page 17</b>    |

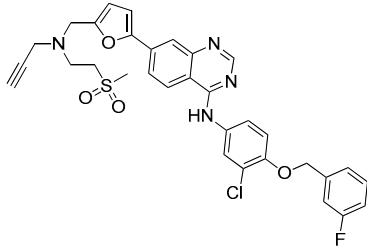

**<sup>1</sup>H-NMR**

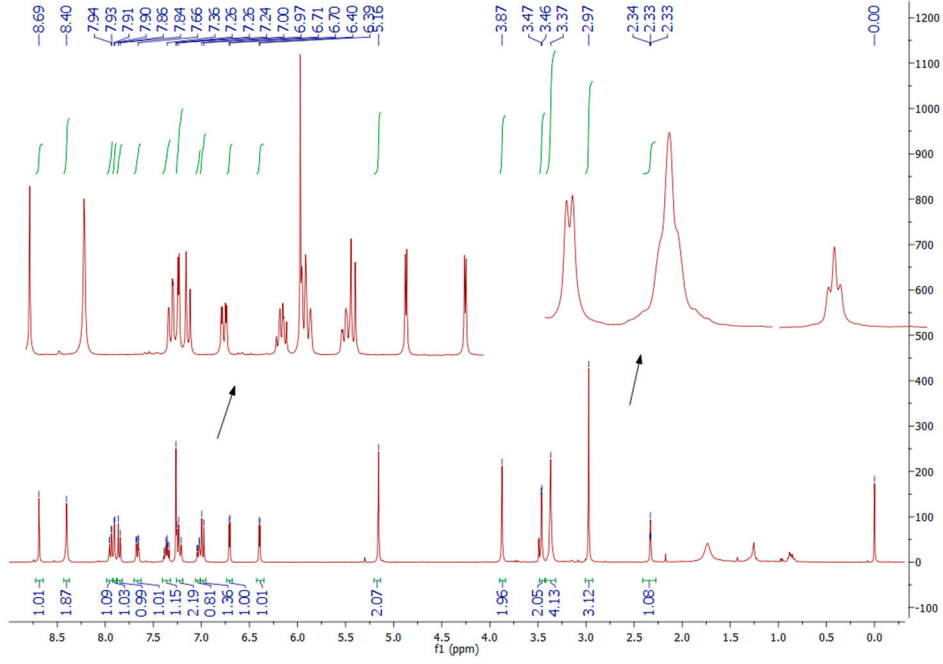

**<sup>13</sup>C-NMR**

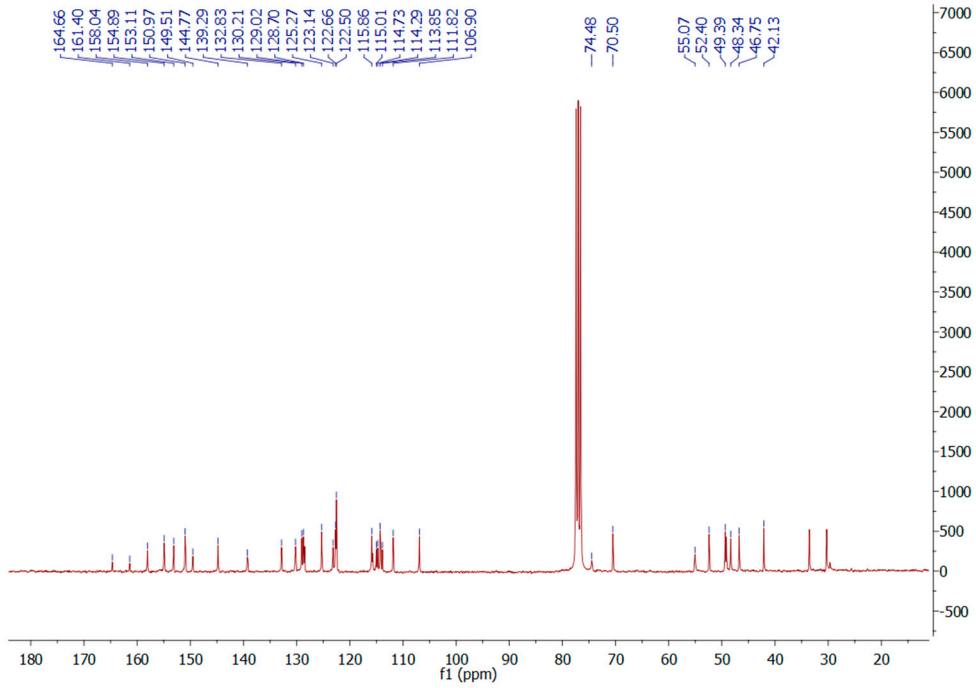

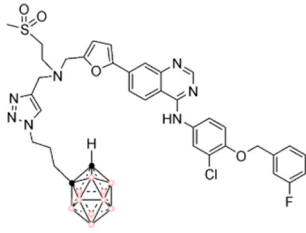

**$^1\text{H}\{^{11}\text{B}\}$ -NMR**

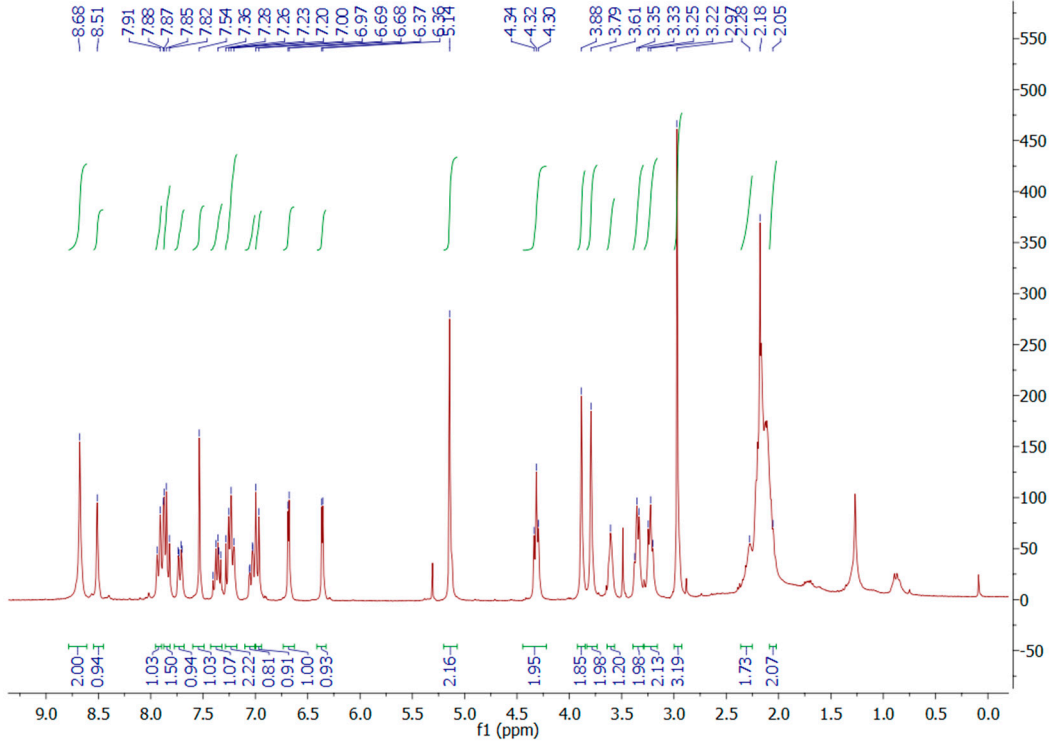

**$^1\text{H}$ -NMR**

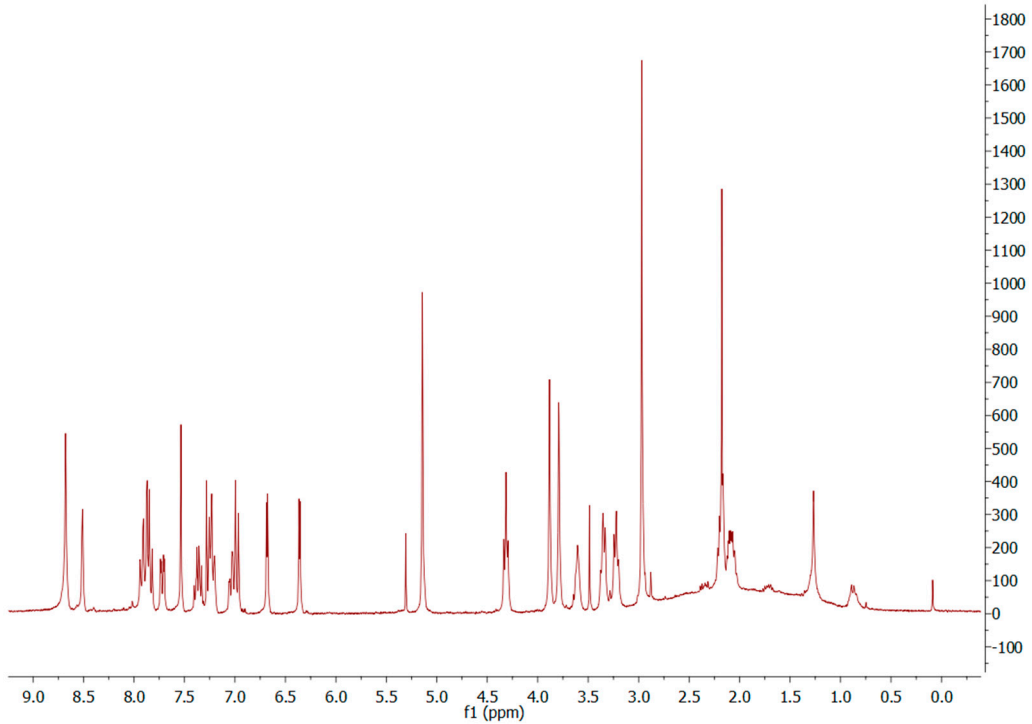

**$^{13}\text{C}$ -NMR**

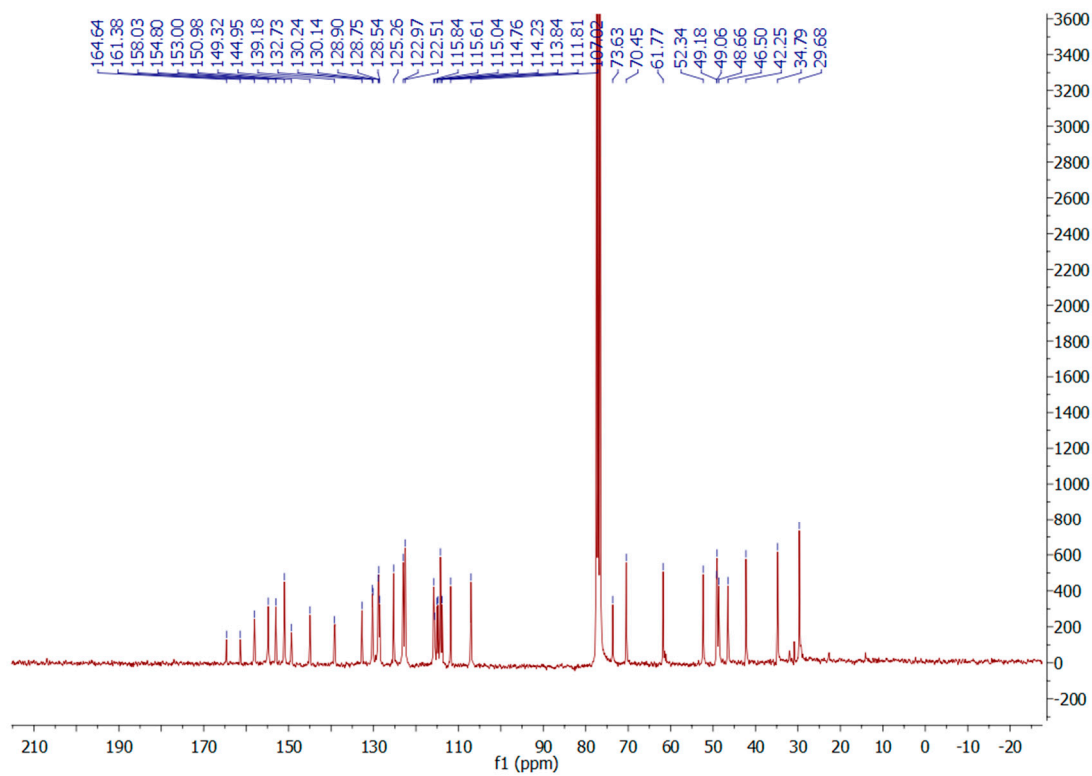

**$^{11}\text{B}\{^1\text{H}\}$ -NMR**

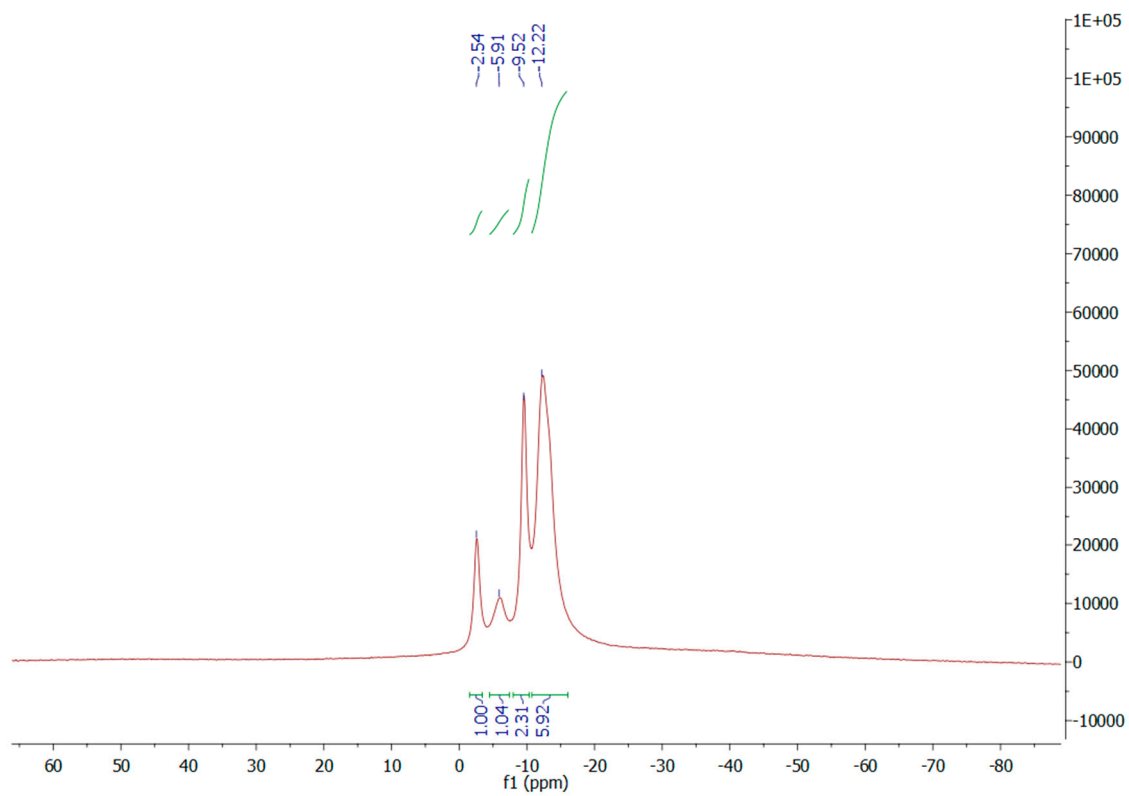

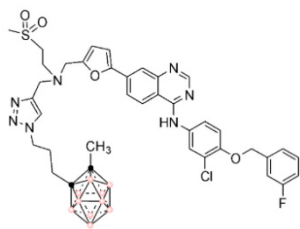

### <sup>1</sup>H-NMR

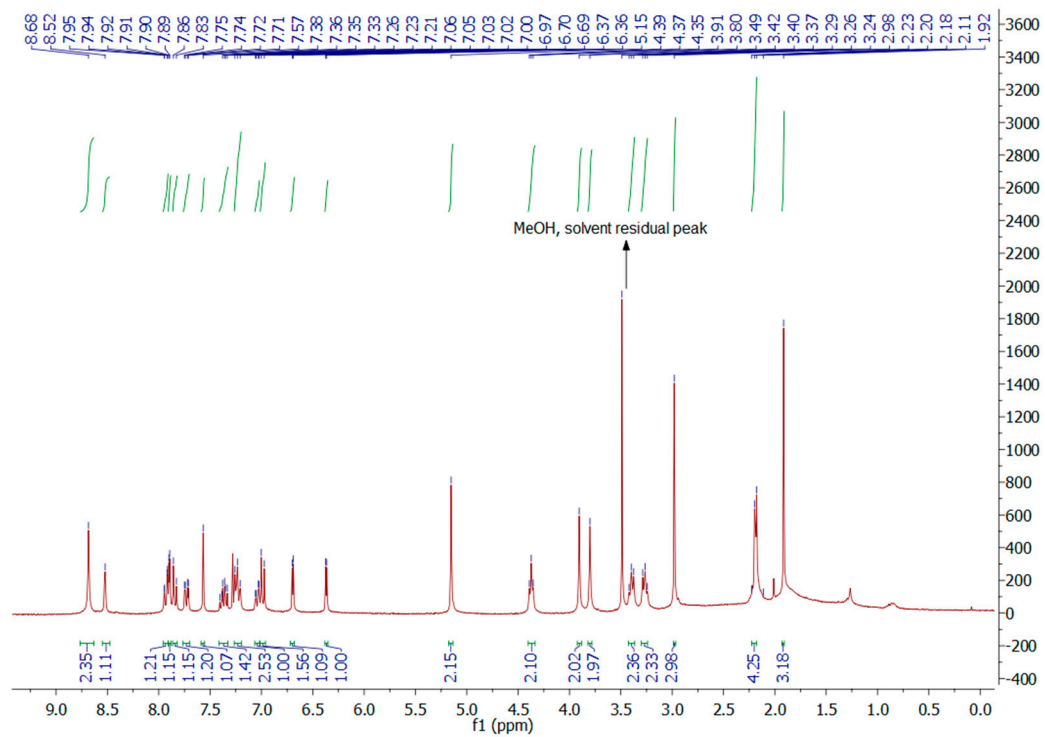

### <sup>13</sup>C-NMR

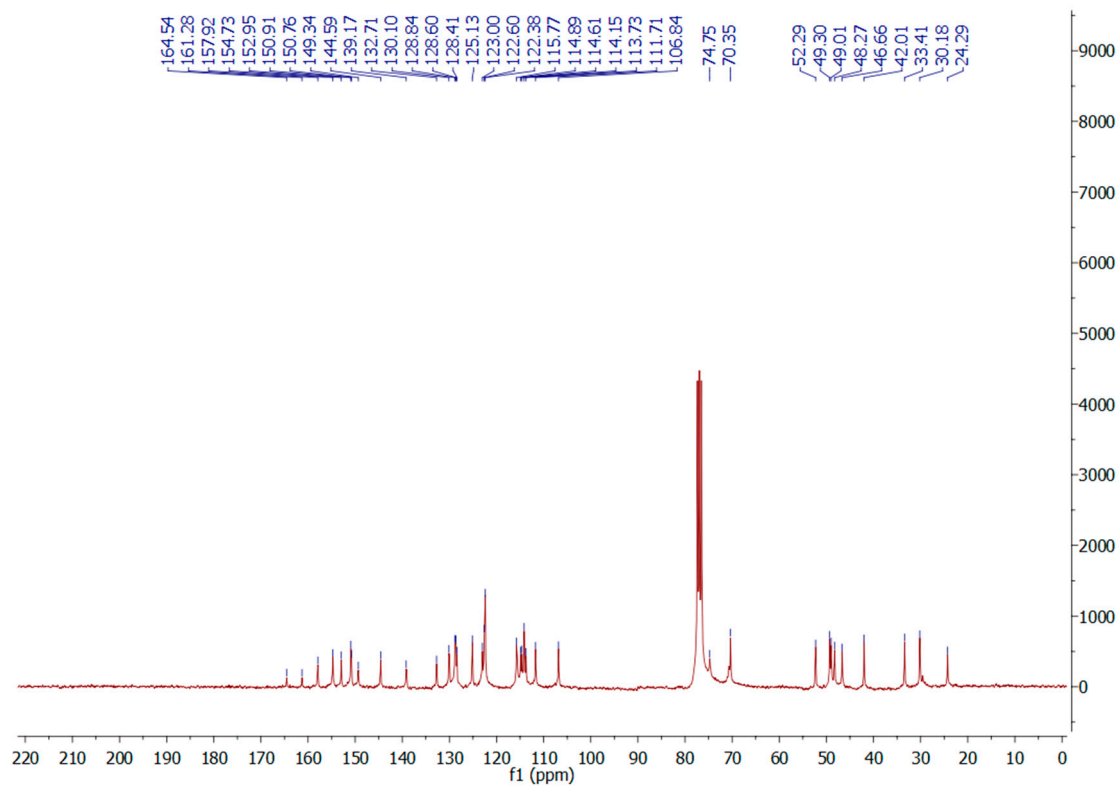

# $^1\text{H}\{^{11}\text{B}\}$ -NMR

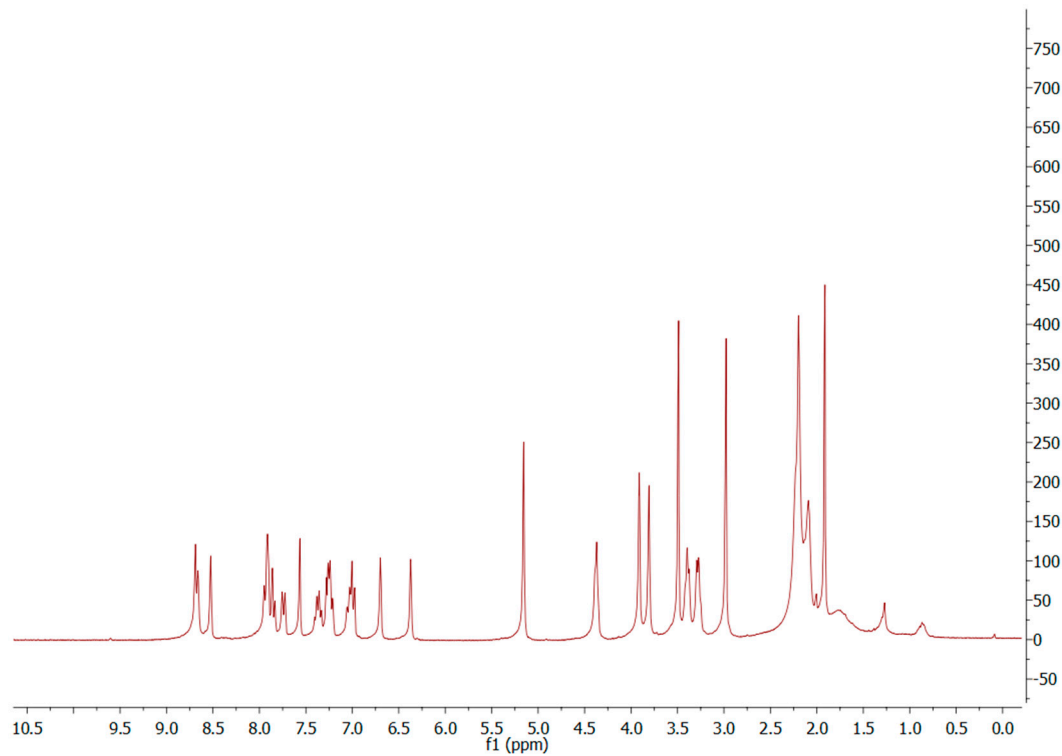

# $^{11}\text{B}\{^1\text{H}\}$ -NMR

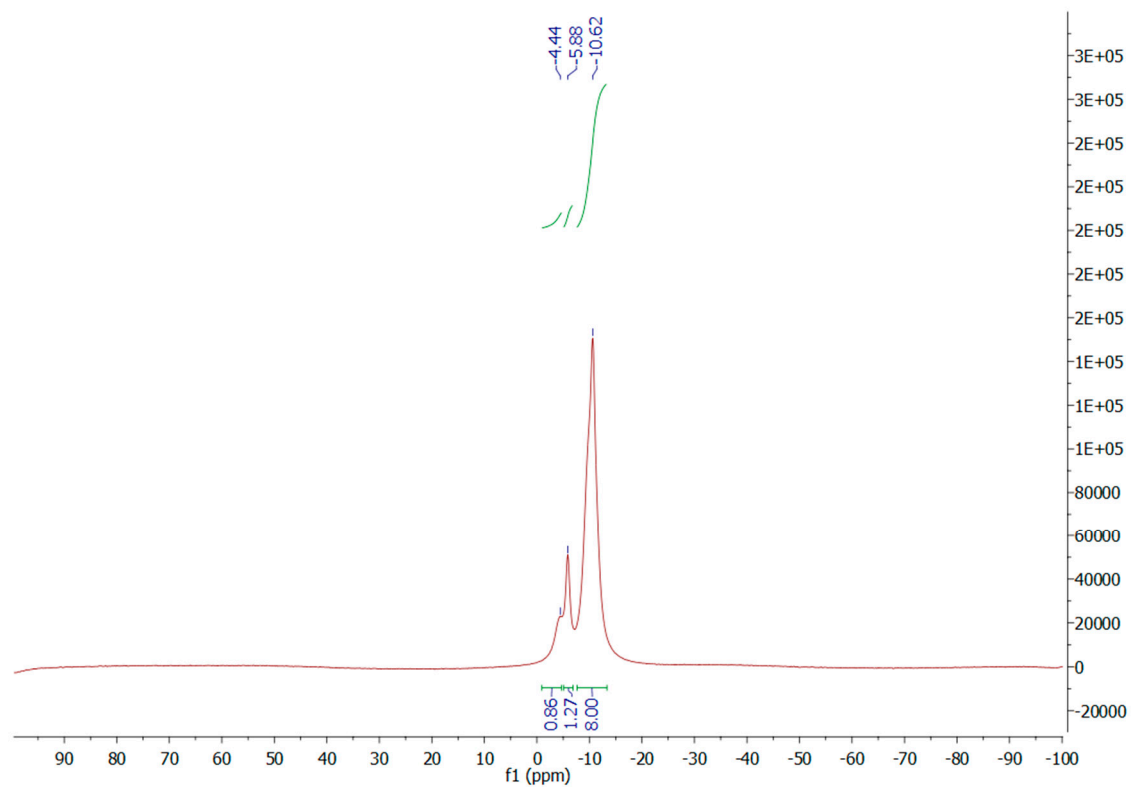

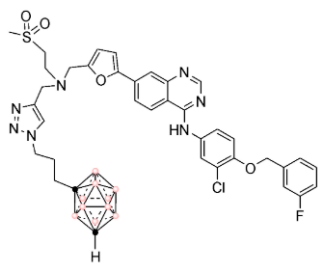

**$^1\text{H}\{^{11}\text{B}\}$ -NMR**

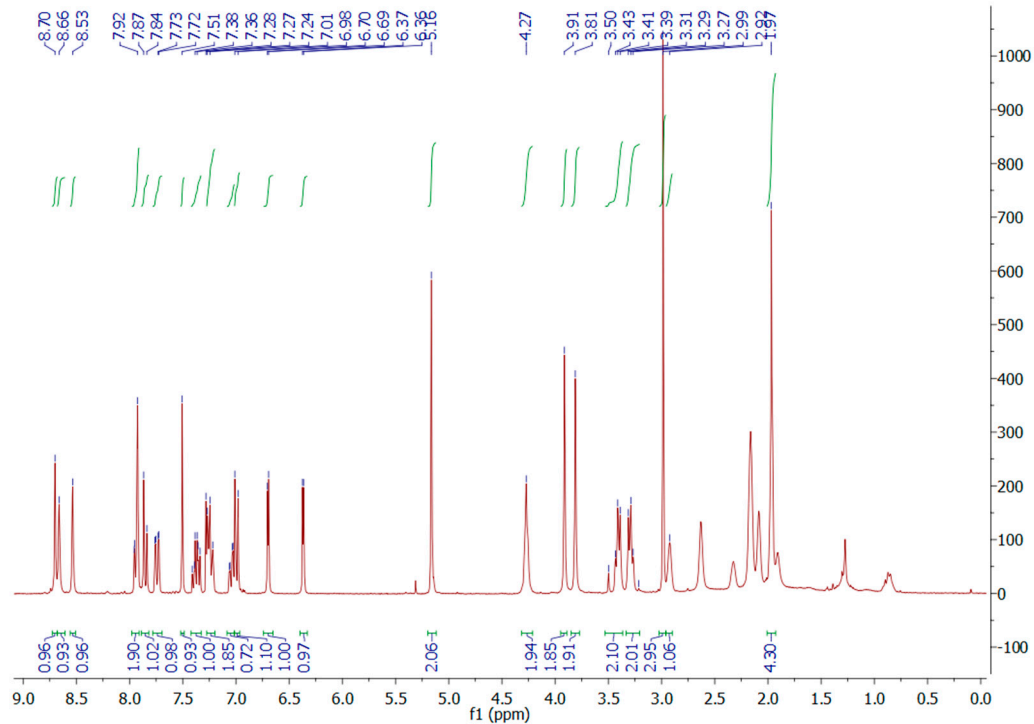

**$^1\text{H}$ -NMR**

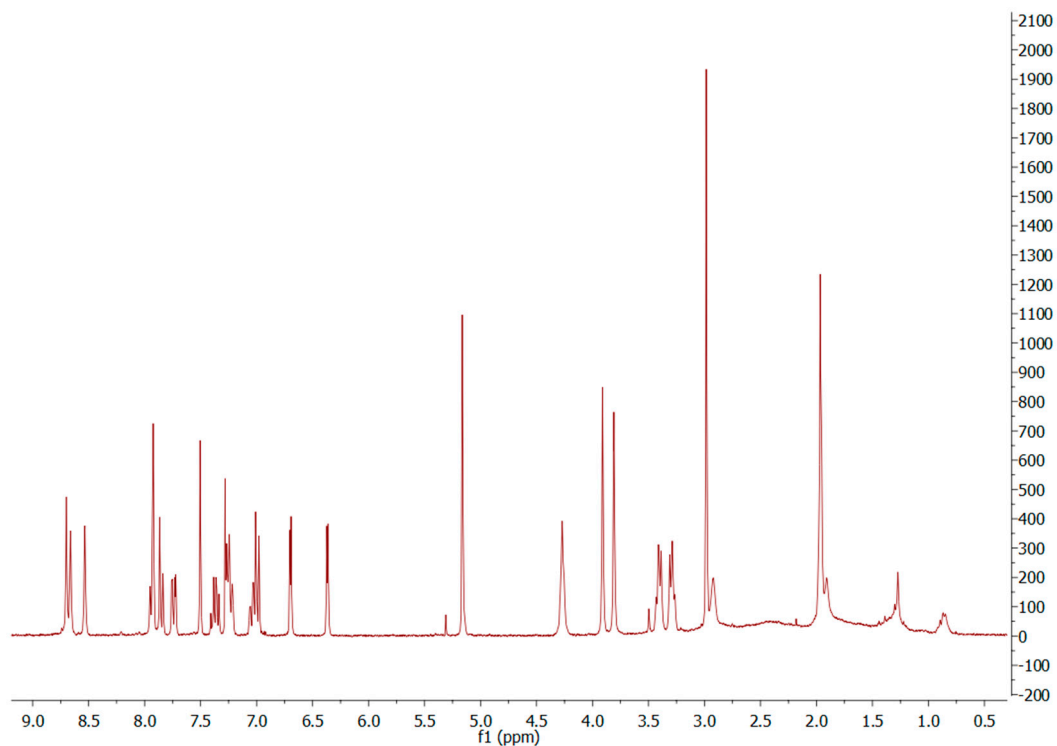

### $^{13}\text{C}$ -NMR

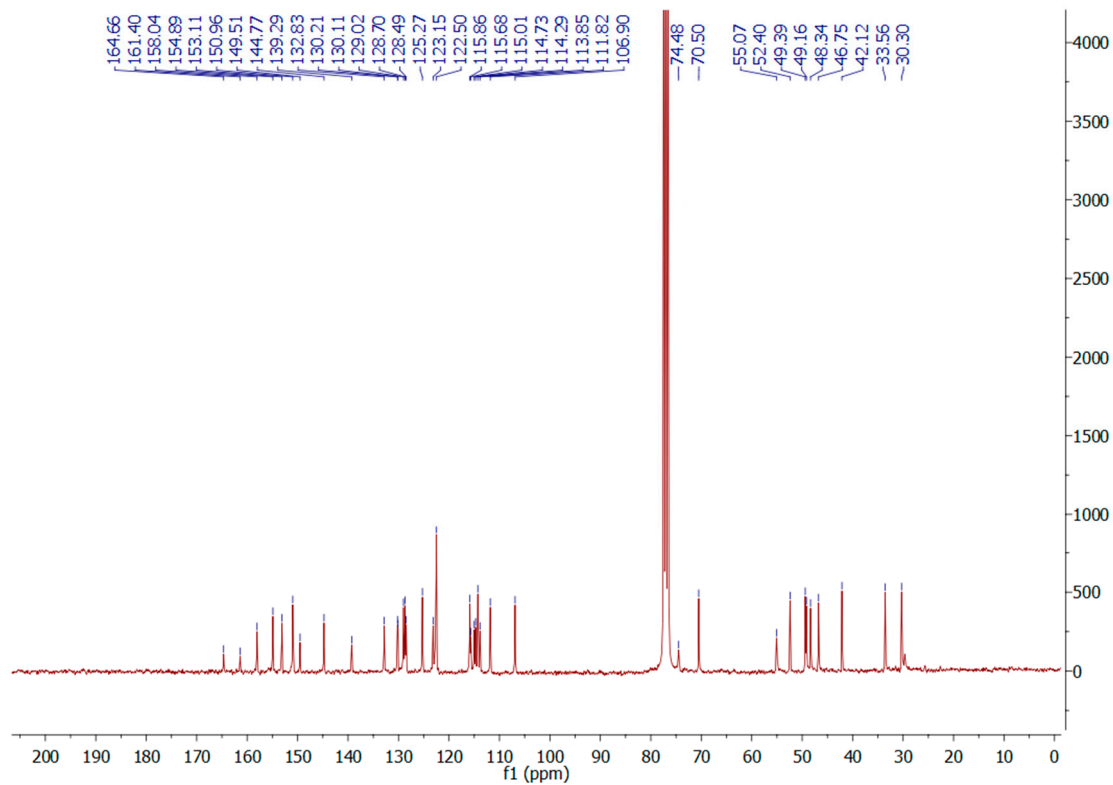

### $^{11}\text{B}\{^1\text{H}\}$ -NMR

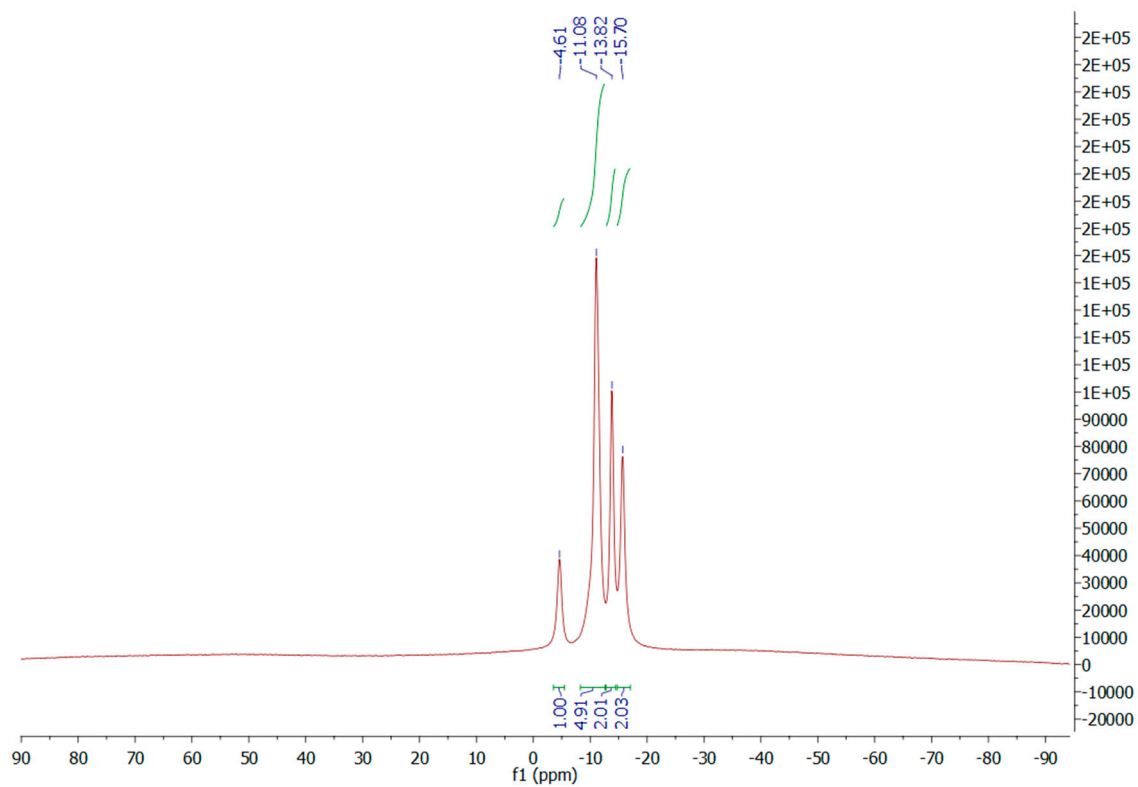



**<sup>11</sup>B-NMR**

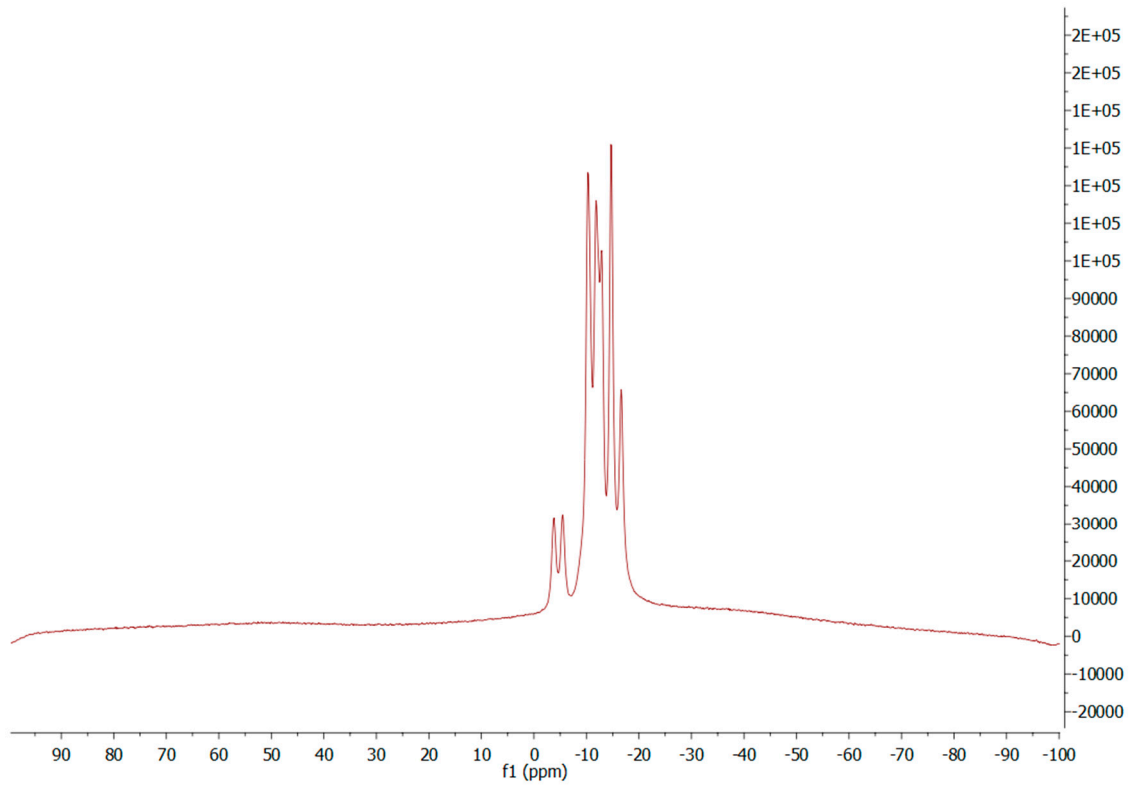

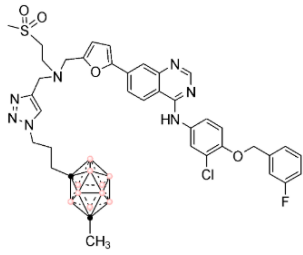

**$^1\text{H}\{^{11}\text{B}\}$ -NMR**

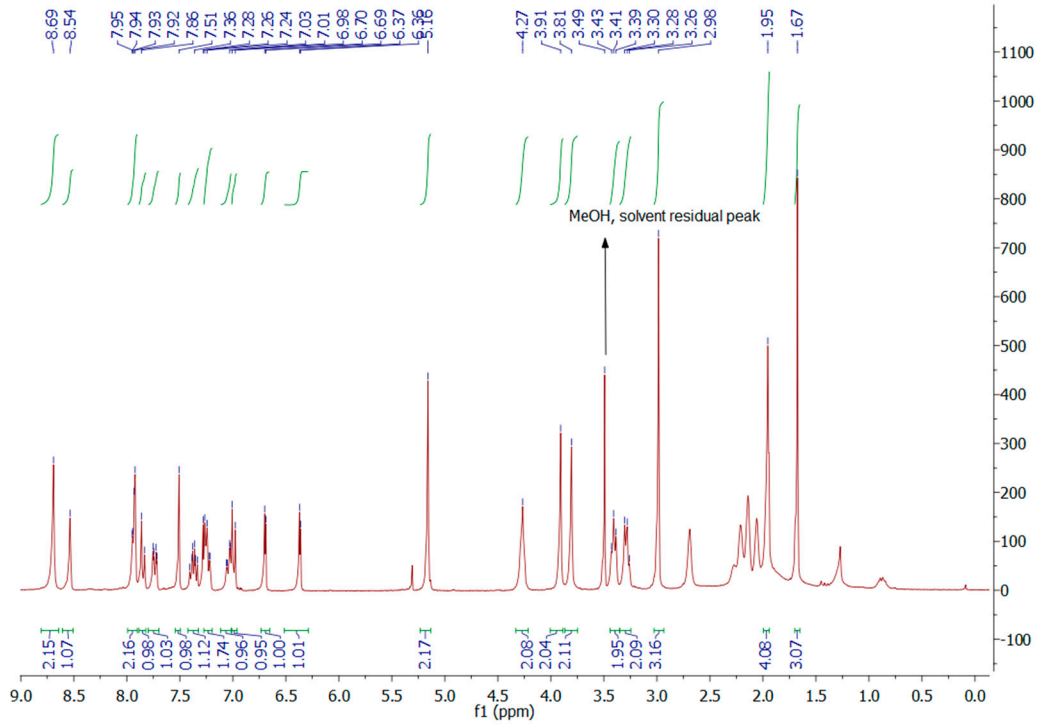

**$^1\text{H}$ -NMR**

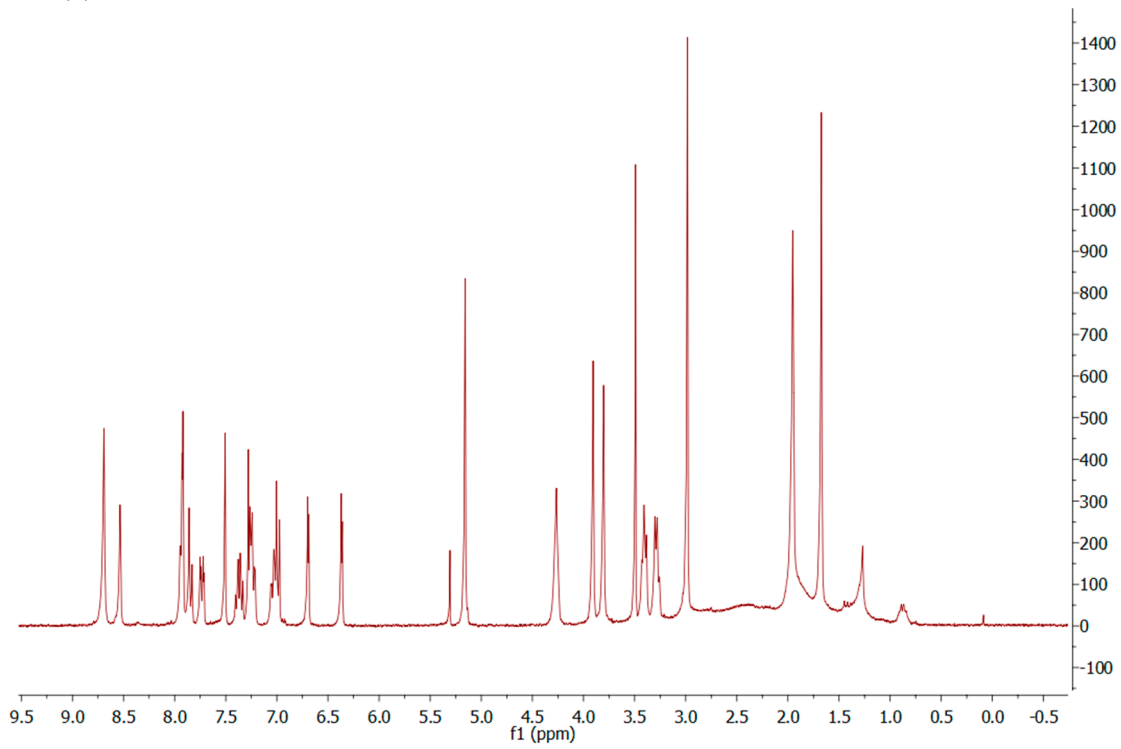

**$^{13}\text{C}$ -NMR**

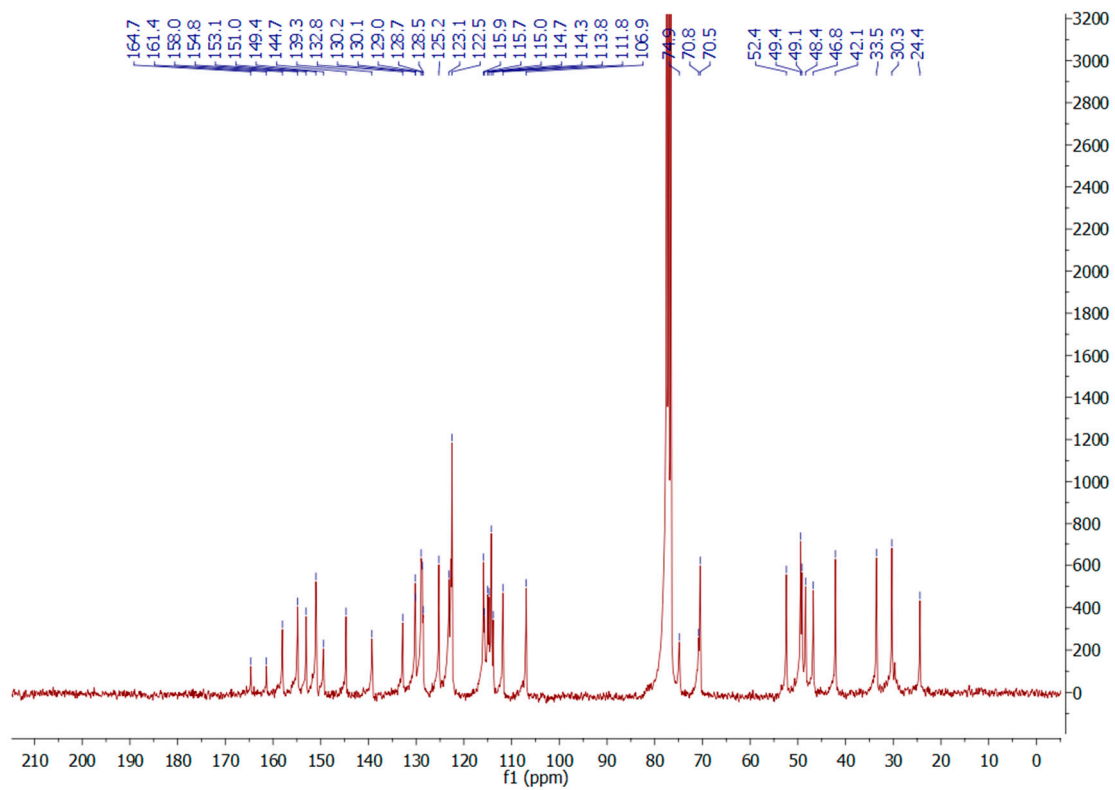

**$^{11}\text{B}\{^1\text{H}\}$ -NMR**

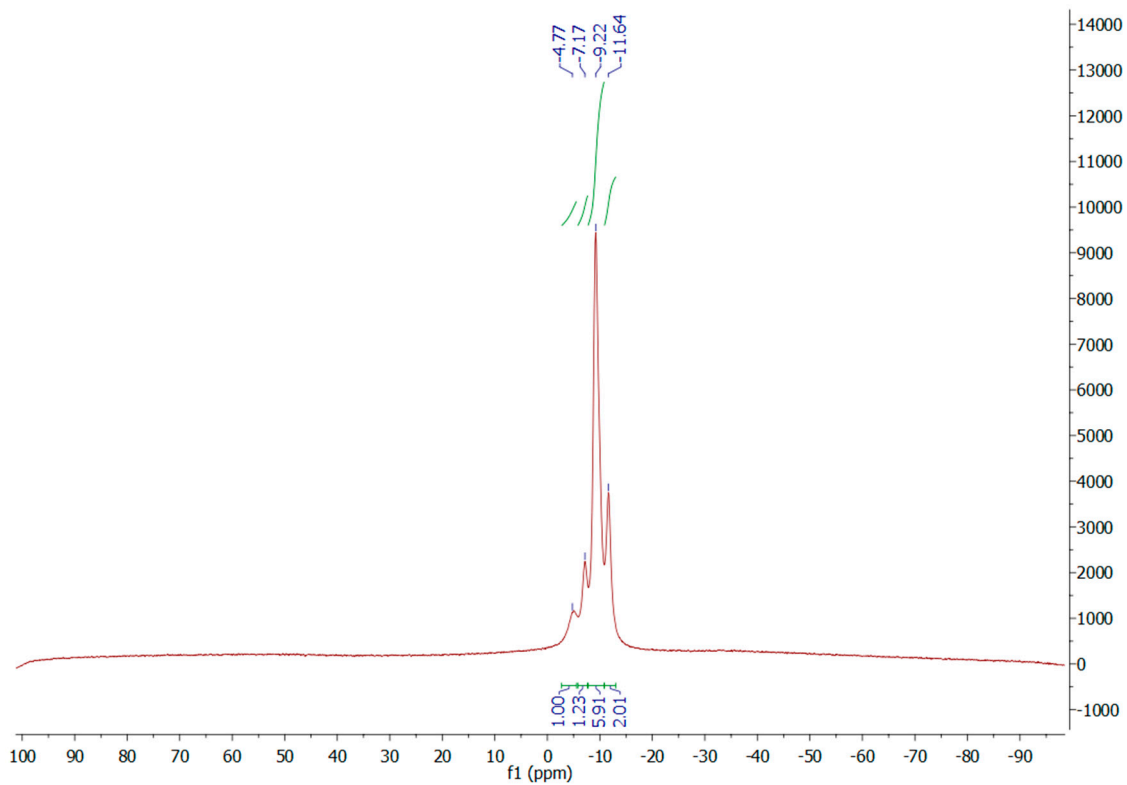

**<sup>11</sup>B-NMR**

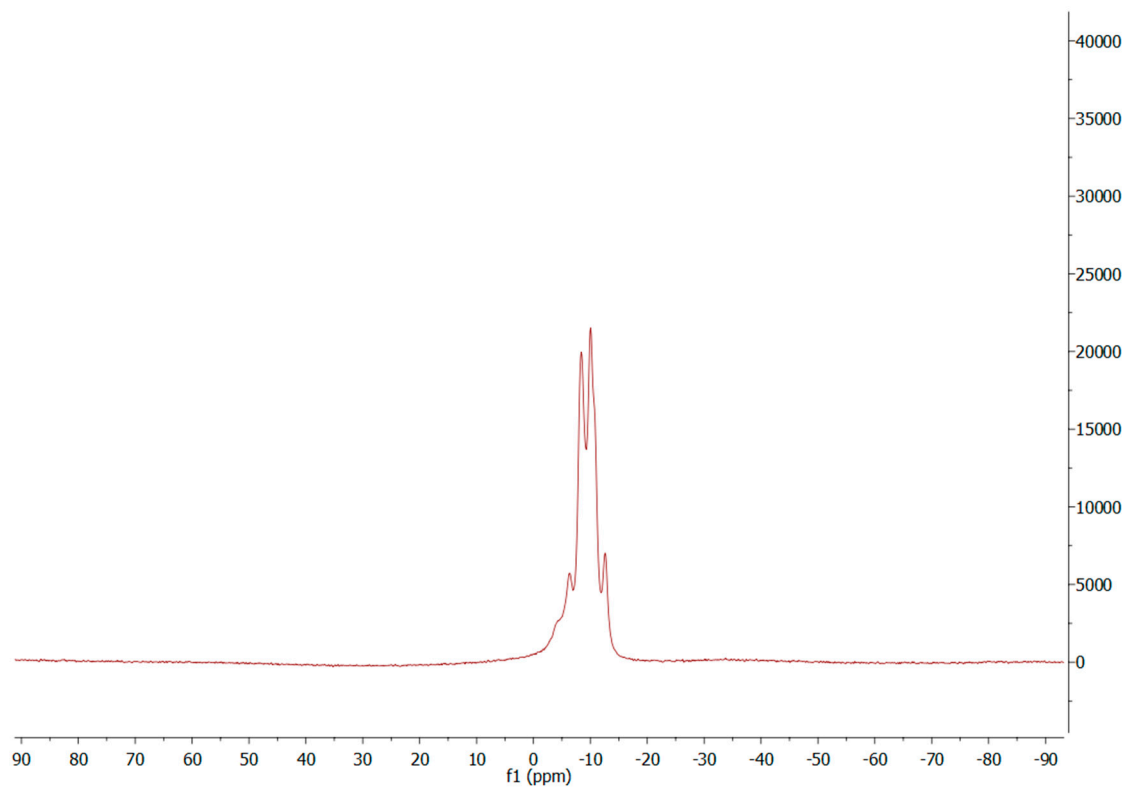

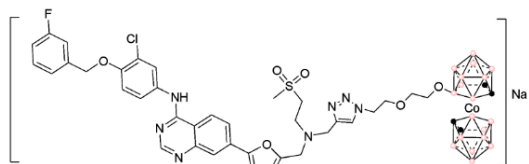

### $^1\text{H}\{^{11}\text{B}\}$ -NMR

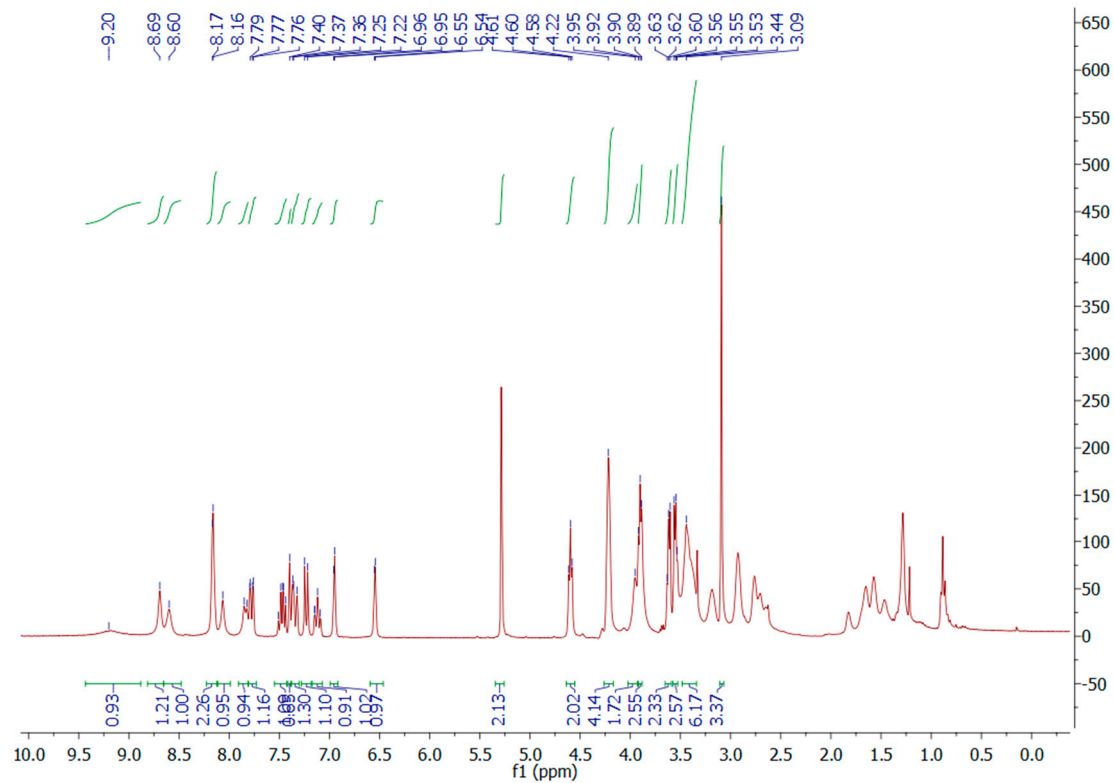

### $^{13}\text{C}$ -NMR

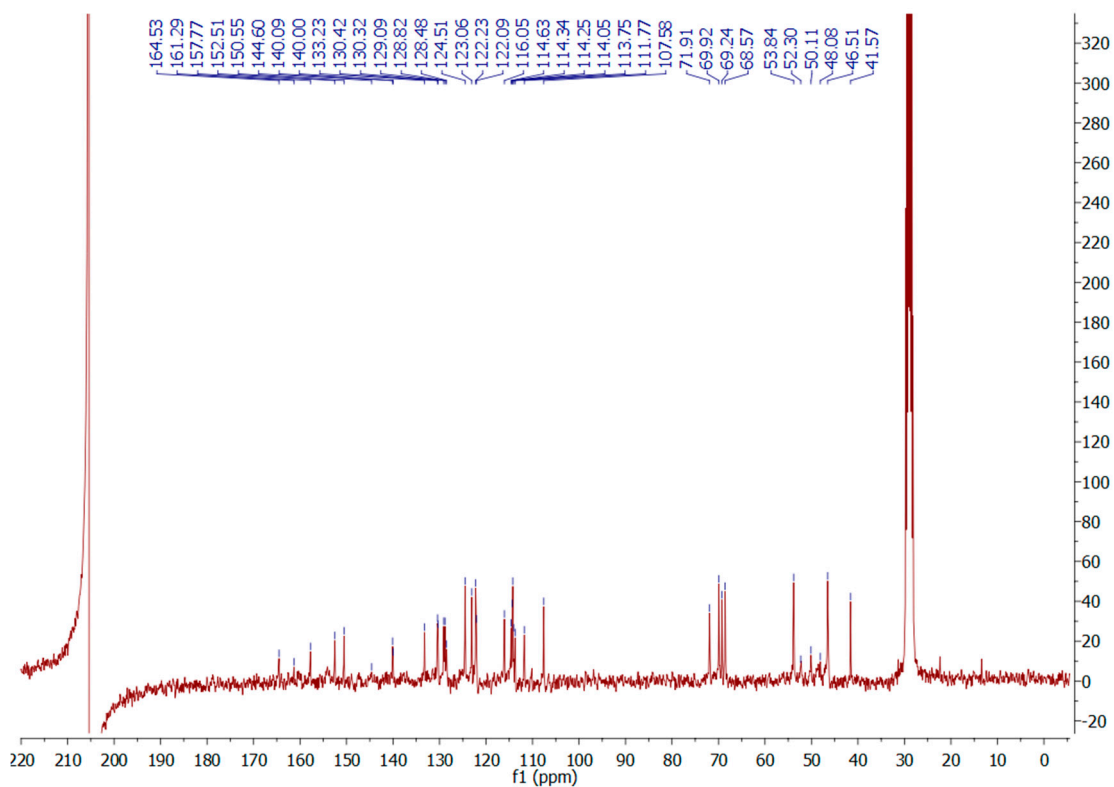

# $^{11}\text{B}\{^1\text{H}\}$ -NMR

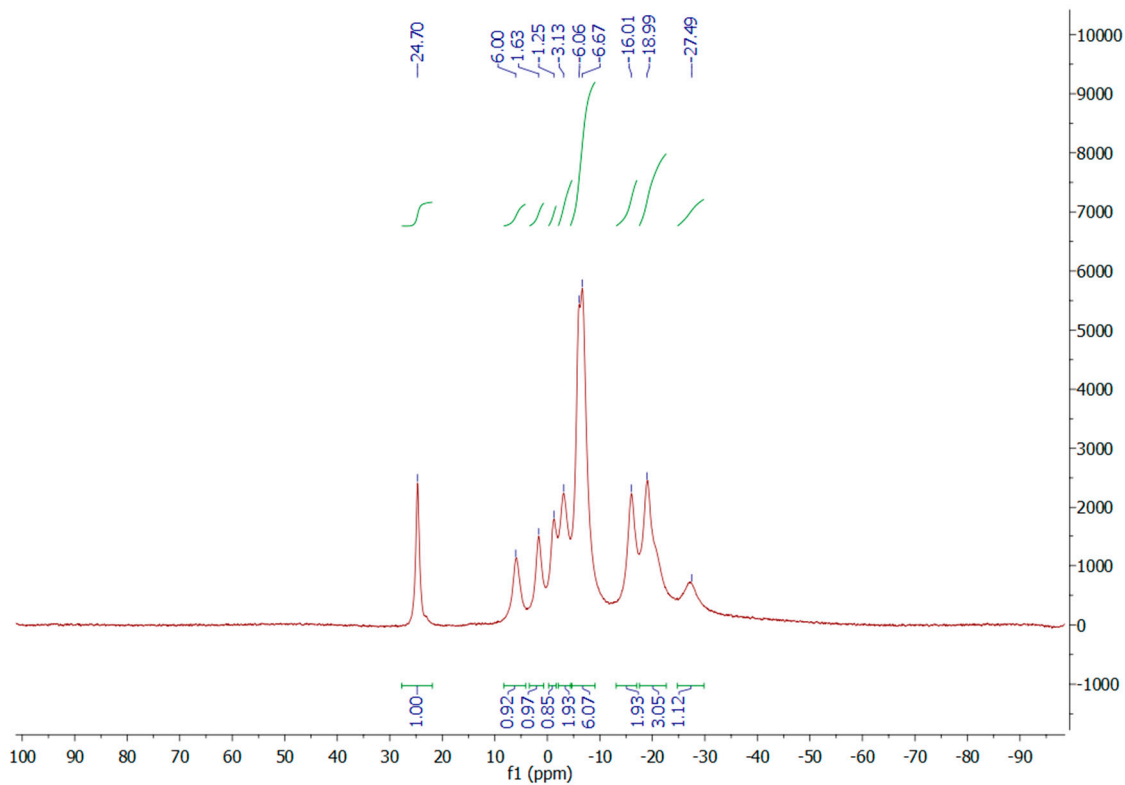

# MALDI-TOF-MS

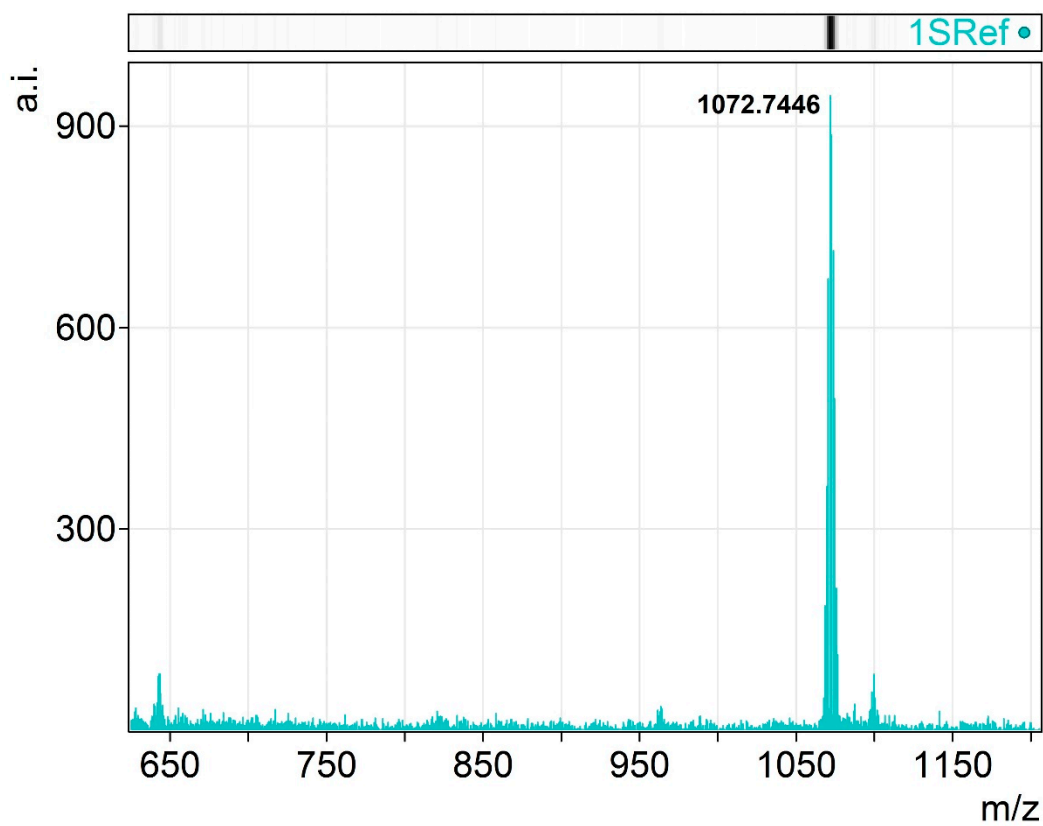

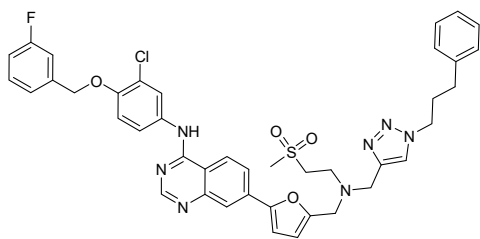

**<sup>1</sup>H-NMR**

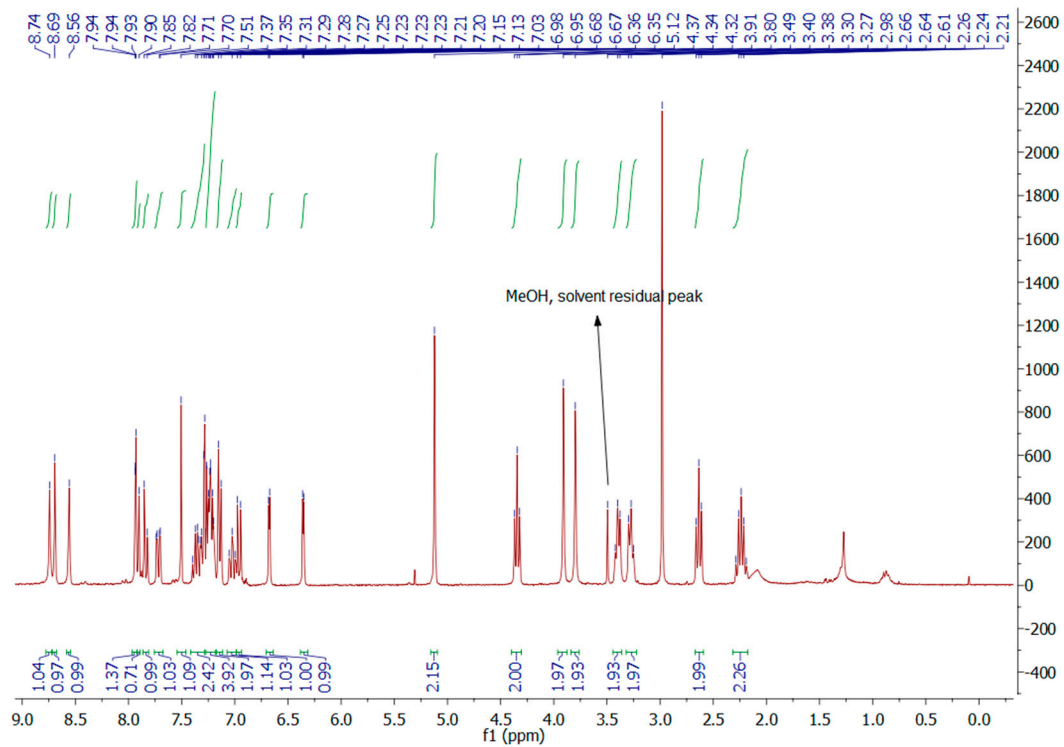

**<sup>13</sup>C-NMR**

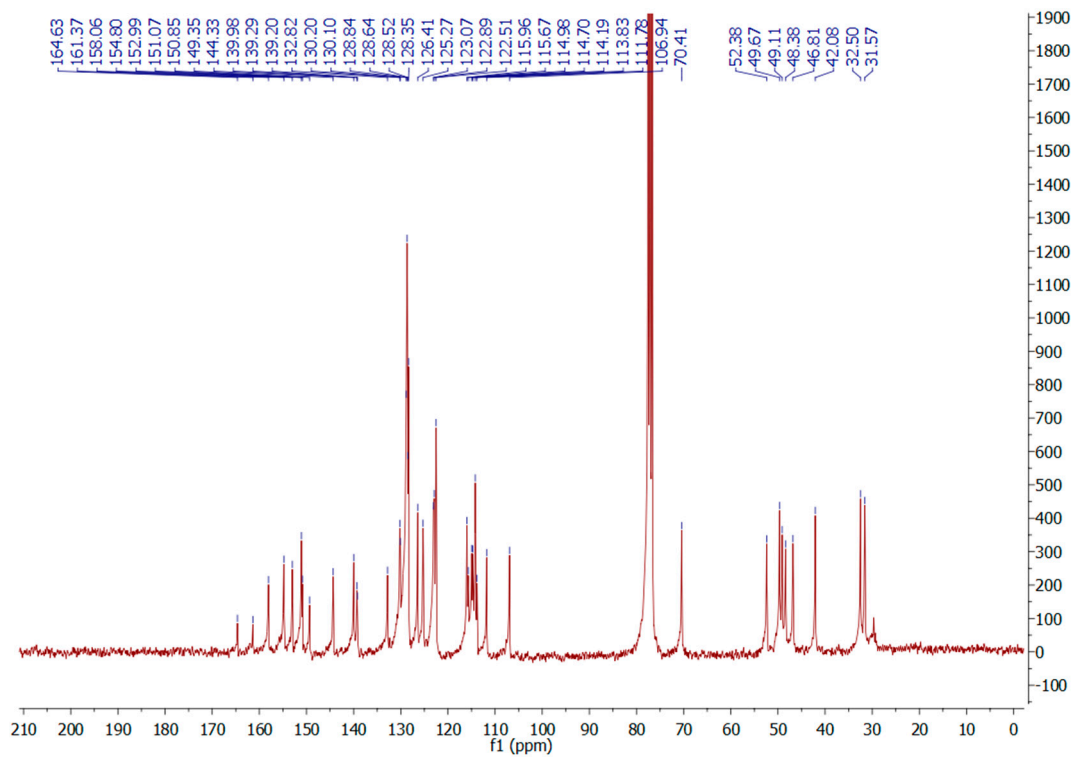

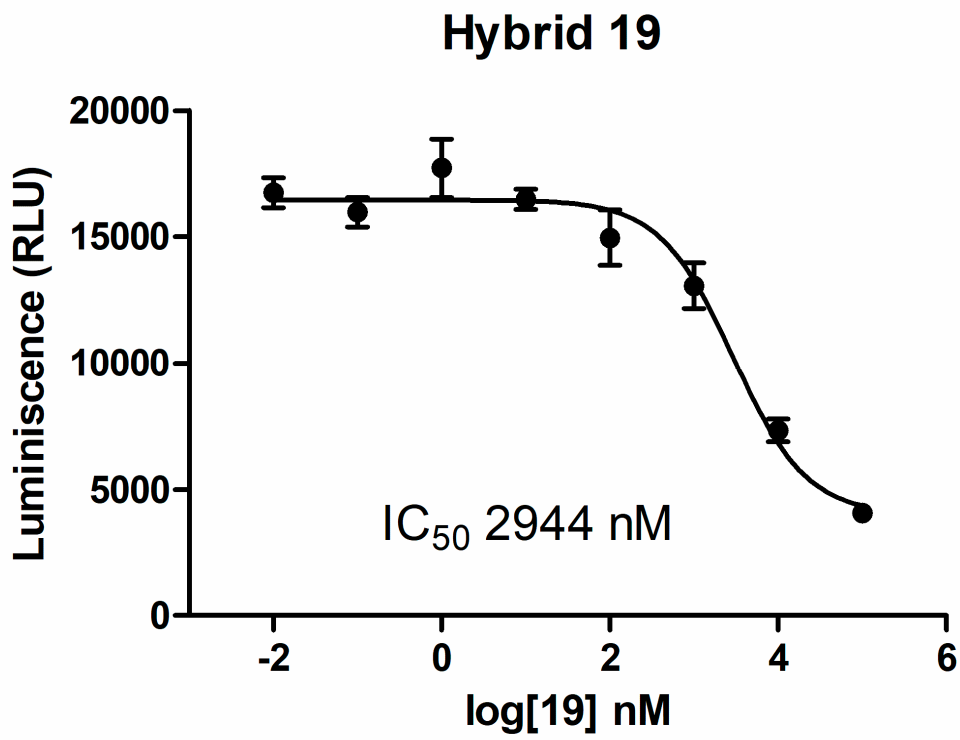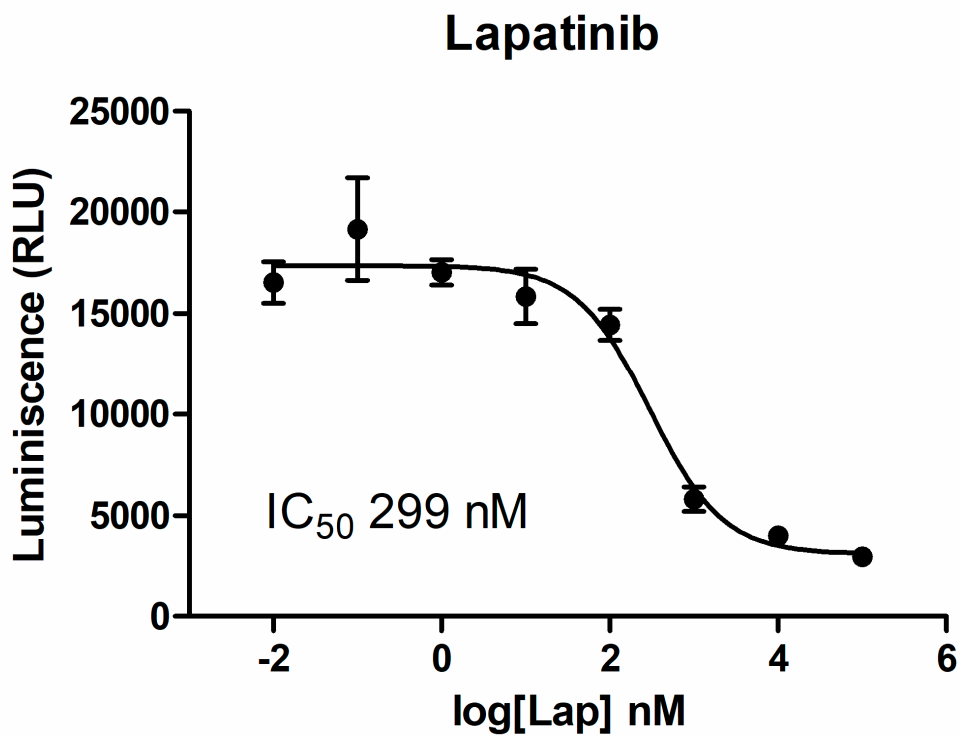

Figure S1. EGFR inhibition. Dose-response curves for hybrid, 19 and Lap.



Lapatinib

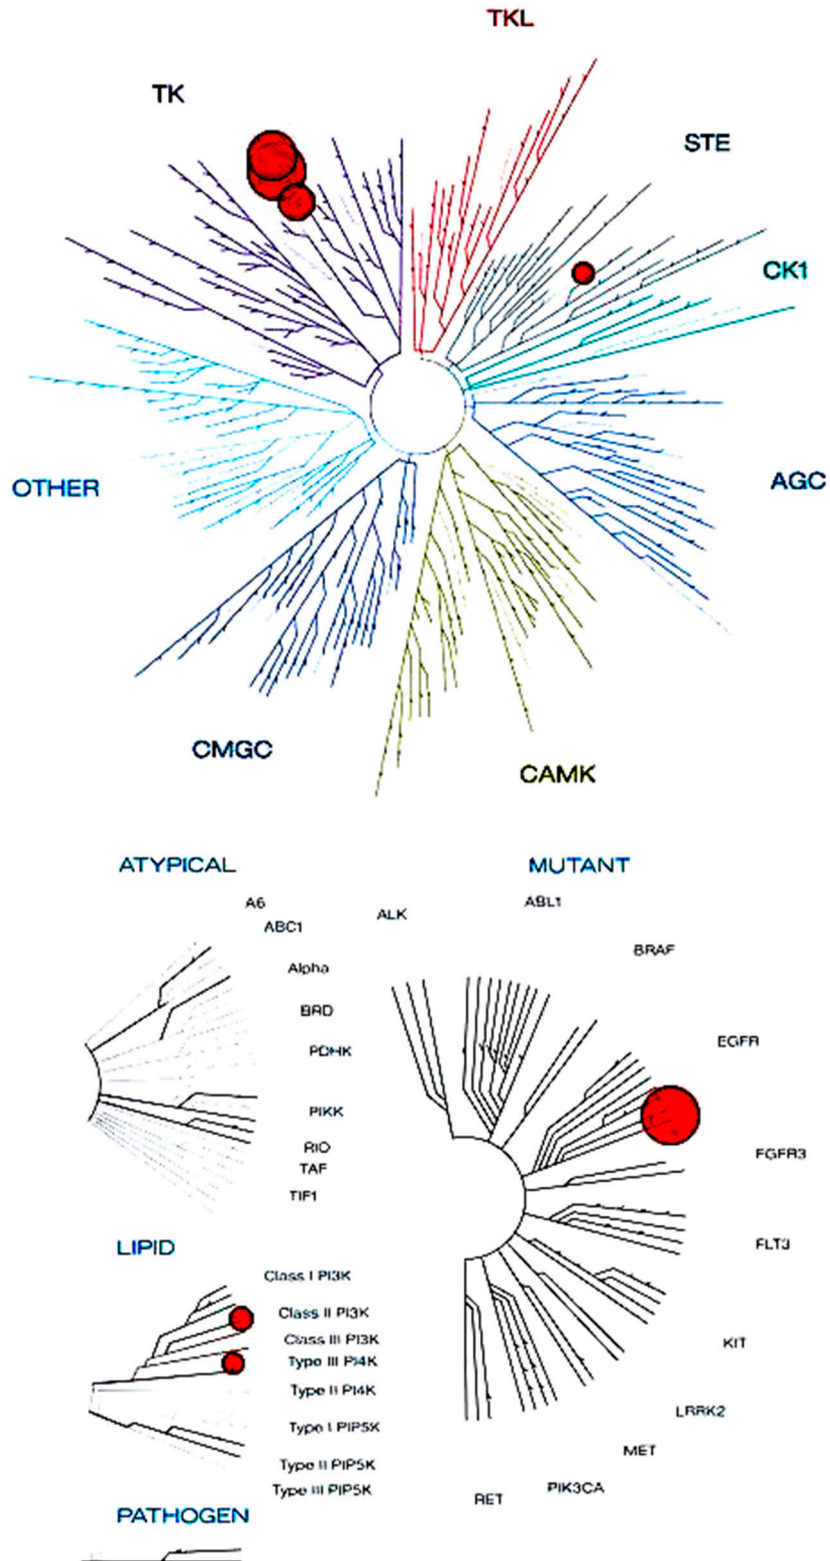

**Figure S2.** Profile of Lap against 468 protein kinases. Relative binding affinities are indicated by red circles in a phylogenetic kinome tree for wild-type enzymes and atypical/mutant/lipo/pathogen variants.. Image generated using TREEspot™ Software Tool (KINOMEScan®, a division of DiscoverX Corporation, © DISCOVERX CORPORATION 2010).
